# Supplementary material for: Dietary Regulation of Oxidative Stress in Chronic Metabolic Diseases
Source: MDPI journal article supplement (doi:10.3390/foods10081854), 2021-08-11
Supplement: s1 [file s1]

# Dietary regulation of oxidative stress in chronic metabolic diseases

Shuai Jiang <sup>1</sup>, Hui Liu <sup>1</sup> and Chunbao Li <sup>1,\*</sup>

**Table S1** Chronic inflammatory diseases in Western diet population and Mediterranean diet population

| Dietary pattern    | Experimental objects            | Methods and Assessment                                       | Major finding                                                                                                                                                               | Reference                  |
|--------------------|---------------------------------|--------------------------------------------------------------|-----------------------------------------------------------------------------------------------------------------------------------------------------------------------------|----------------------------|
| Western diet       | 2284 participants               | A community-based prospective study (4.7 years)              | Western dietary was significantly increased the pattern changes in serum insulin for CVD                                                                                    | Mirmiran et al. [51]       |
|                    | 50 healthy adult participants   | A cross-sectional study with food frequency questionnaire    | An obesogenic diet may sensitize healthy individuals to acute stress on cognitive performance                                                                               | Delgado et al. [52]        |
|                    | 44444 men (26 years)            | A prospective cohort study with food frequency questionnaire | A higher Western dietary pattern score was associated with an increased risk for gout                                                                                       | Rai et al. [53]            |
|                    | 255 cohort (60–64 years)        | A food frequency questionnaire                               | Western dietary was each independently associated with smaller left hippocampal volume and hippocampal atrophy                                                              | Felice et al. [54]         |
|                    | 6204 women (50-69 years)        | A cross-sectional study                                      | Western dietary pattern has the highest correlation with chronic diseases                                                                                                   | Markussen et al. [55]      |
|                    | Older adults in China           | A randomized experiment                                      | Western diet was significantly related to obesity, hypertension and the metabolic syndrome                                                                                  | Jing et al. [56]           |
|                    | 5267 children in China          | A multistage random                                          | Western diet was significantly associated with higher concentrations of low-density lipoprotein cholesterol, triglycerides and a lower high-density lipoprotein cholesterol | Shang et al. [57]          |
| Mediterranean diet | 93,122 women (50–79 years)      | A WHI study (10.5 years)                                     | Mediterranean dietary may be associated with a lower risk of cardiac sudden death                                                                                           | Bertoia et al. [69]        |
|                    | 7769 participants (20–65 years) | A doetinchem cohort study (10 years)                         | Mediterranean diet was associated with a 23% lower risk of composite CVD                                                                                                    | Hoeveraar-Blom et al. [70] |

|                               |                                                                               |                                                                                                                                                                       |                       |
|-------------------------------|-------------------------------------------------------------------------------|-----------------------------------------------------------------------------------------------------------------------------------------------------------------------|-----------------------|
| 4172412 subjects              | A Meta-analyses studies                                                       | Mediterranean diet was an 8% reduction of overall mortality, a 10% reduced risk of CVD and a 4% reduction of neoplastic disease                                       | Sofi et al. [71]      |
| 7447 persons (55 to 80 years) | A multicenter trial (4.8 years)                                               | Mediterranean diet supplemented with extra-virgin olive oil or nuts reduced the incidence of cardiovascular events in high cardiovascular risk                        | Estruch et al. [72]   |
| 235 subjects (66.5 years)     | A randomized, parallel-design, controlled trial                               | Mediterranean diet supplemented with extra-virgin olive oil or nuts reduced 24-hour ambulatory BP, total cholesterol, and fasting glucose in high cardiovascular risk | Domenech et al. [73]  |
| 1424 adult                    | A food frequency questionnaire (10 years)                                     | Higher Mediterranean diet is associated with better cognitive performance, therefore less cognitive decline in older but not middle-aged individuals                  | Wade et al. [74]      |
| 2,258 subjects (65 and over)  | A longitudinal with dietary composite questionnaire (4.5 years)               | Higher Mediterranean diet was associated with a reduced risk of developing and progression to AD                                                                      | Scarmeas et al. [75]  |
| 2,247 subjects (65 and over)  | A longitudinal with the Godin leisure time exercise questionnaire (5.4 years) | Higher Mediterranean diet adherence was associated with reduced risk for AD                                                                                           | Scarmeas et al. [76]  |
| 110 females (55 to 80 years)  | A large trial (1 years)                                                       | Mediterranean diet can reduce the contents of urinary F2-IP and urinary 8-oxo-dG, and reduce the oxidative damage to lipids and DNA in Metabolic syndrome individuals | Mitjavila et al. [77] |

---
